# Supplementary material for: FedscGen: privacy-preserving federated batch effect correction of single-cell RNA sequencing data
Source: Springer Nature journal article supplement (doi:10.1186/s13059-025-03684-6), 2025-07-22
Supplement: MOESM1 [file 13059_2025_3684_MOESM1_ESM.pdf › 13059_2025_3684_MOESM1_ESM.pdf]

## Datasets

In this study we used eight datasets for evaluating the performance of FedscGen and scGen models in terms of batch effect correction. The statistics of each datasets considering the preprocessing steps are give in Table:

Table S1: Dataset statistics

| Dataset                                                        | Accession                        | N cells per batch | Technologies (1) | Source                                                                                                                                          |
|----------------------------------------------------------------|----------------------------------|-------------------|------------------|-------------------------------------------------------------------------------------------------------------------------------------------------|
| CL (Cell Line)                                                 | 293T                             | 2,885             | 10X              | <a href="http://scanorama.csail.mit.edu/data.tar.gz">http://scanorama.csail.mit.edu/data.tar.gz</a> .                                           |
|                                                                | Jurkat                           | 3,258             |                  |                                                                                                                                                 |
|                                                                | 50%:50% Jurkat:293T Cell Mixture | 3,388             |                  |                                                                                                                                                 |
| HDC (Human Dendritic Cells) (2)                                | GSE80171                         | 576               | SMART-seq        | <a href="https://www.ncbi.nlm.nih.gov/geo/query/acc.cgi?acc=GSE80171">https://www.ncbi.nlm.nih.gov/geo/query/acc.cgi?acc=GSE80171</a>           |
| HP(Human Pancreas) (1,3–7)                                     | GSE85241                         | 2,122             | CelSeq2          | <a href="https://hemberg-lab.github.io/scRNA.seq.datasets/human/pancreas/">https://hemberg-lab.github.io/scRNA.seq.datasets/human/pancreas/</a> |
|                                                                | E-MTAB-5061                      | 2,127             | SMART-seq2       |                                                                                                                                                 |
|                                                                | GSE84133                         | 8,569             | inDrops          |                                                                                                                                                 |
|                                                                | GSE83139                         | 457               | SMARTer          |                                                                                                                                                 |
|                                                                | GSE81608                         | 1,492             | SMARTer          |                                                                                                                                                 |
| MB (Mouse Brain) (8,9)                                         | GSE116470                        | 691,600           | Drop-seq         | <a href="http://scanorama.csail.mit.edu/data.tar.gz">http://scanorama.csail.mit.edu/data.tar.gz</a> .                                           |
|                                                                | GSE110823                        | 141,606           | SPLiT-seq        |                                                                                                                                                 |
| MCA (Mouse Cell Atlas) (10,11)                                 | GSE108097                        | 4,239             | microwell-seq    | <a href="https://www.ncbi.nlm.nih.gov/geo">https://www.ncbi.nlm.nih.gov/geo</a>                                                                 |
|                                                                | GSE109774                        | 2,715             | 10X              |                                                                                                                                                 |
| MHSPC (Mouse Haematopoietic Stem and Progenitor Cells) (12,13) | GSE81682                         | 1,920             | SMART-seq2       | <a href="https://www.ncbi.nlm.nih.gov/geo">https://www.ncbi.nlm.nih.gov/geo</a>                                                                 |

|                                                   |            |        |          |                                                                                                                                                     |
|---------------------------------------------------|------------|--------|----------|-----------------------------------------------------------------------------------------------------------------------------------------------------|
|                                                   | GSE72857   | 2,729  | MARS-seq |                                                                                                                                                     |
| MR(Mouse Retina) (14,15)                          | GSE81904   | 26,830 | Drop-seq | <a href="https://hemberg-lab.github.io/scRNA.seq.datasets/mouse/retina/">https://hemberg-lab.github.io/scRNA.seq.datasets/mouse/retina/</a>         |
|                                                   | GSE63473   | 44,808 |          |                                                                                                                                                     |
| PBMC(human Peripheral Blood Mononuclear Cell) (1) | 3' dataset | 8,098  | 10X      | <a href="ftp://ngs.sanger.ac.uk/production/teichmann/BBKNN/PBMC.merged.h5ad">ftp://ngs.sanger.ac.uk/production/teichmann/BBKNN/PBMC.merged.h5ad</a> |
|                                                   | 5' dataset | 7,378  |          |                                                                                                                                                     |

Table S2: Cell type inclusion statistics

| Dataset | Cell type | Number of samples per cell | Standalone | Dropped/ Combined |
|---------|-----------|----------------------------|------------|-------------------|
| HDC     | CD1C      | 95                         | True       | False             |
|         | CD141     | 94                         | True       | False             |
|         | DoubleNeg | 190                        | False      | False             |
|         | pDC       | 190                        | False      | False             |
| MHSPC   | CMP       | 548                        | False      | False             |
|         | GMP       | 1148                       | False      | False             |
|         | LMPP      | 280                        | True       | True              |
|         | LTHSC     | 323                        | True       | True              |
|         | MEP       | 1381                       | False      | False             |
|         | MPP       | 368                        | True       | True              |
|         | Unsorted  | 136                        | True       | True              |
| MCA     | B-cell    | 1106                       | False      | False             |

|    |               |      |       |       |
|----|---------------|------|-------|-------|
|    | Dendritic     | 220  | False | True  |
|    | Endothelial   | 1134 | False | False |
|    | Epithelial    | 390  | False | True  |
|    | Macrophage    | 469  | False | False |
|    | Monocyte      | 480  | False | False |
|    | NK            | 85   | False | True  |
|    | Neutrophil    | 454  | False | False |
|    | Smooth-muscle | 163  | False | True  |
|    | Stromal       | 1032 | False | False |
|    | T-cell        | 1421 | False | False |
| HP | MHC class II  | 5    | True  | True  |
|    | acinar        | 1368 | False | False |
|    | alpha         | 5100 | False | False |
|    | beta          | 3826 | False | False |
|    | delta         | 966  | False | False |
|    | ductal        | 1804 | False | False |
|    | endothelial   | 289  | False | True  |
|    | epsilon       | 28   | False | True  |
|    | gamma         | 656  | False | False |
|    | macrophage    | 55   | True  | True  |
|    | mast          | 32   | False | True  |
|    | mesenchymal   | 107  | False | True  |
|    | schwann       | 13   | True  | True  |
|    | stellate      | 511  | False | True  |
|    | t_cell        | 7    | True  | True  |

|      |                             |       |       |       |
|------|-----------------------------|-------|-------|-------|
| PBMC | B cell                      | 2371  | False | False |
|      | CD4 T cell                  | 4450  | False | False |
|      | CD8 T cell                  | 3142  | False | False |
|      | Hematopoietic stem cell     | 24    | False | True  |
|      | Megakaryocyte               | 106   | False | True  |
|      | Monocyte_CD14               | 4090  | False | False |
|      | Monocyte_FCGR3A             | 561   | False | False |
|      | NK cell                     | 593   | False | False |
|      | Plasmacytoid dendritic cell | 139   | False | True  |
| CL   | 293t                        | 4490  | False | False |
|      | jurkat                      | 5041  | False | False |
| MR   | amacrine                    | 4668  | False | False |
|      | astrocytes                  | 52    | True  | True  |
|      | bipolar                     | 29766 | False | False |
|      | cones                       | 1909  | False | False |
|      | fibroblasts                 | 82    | True  | True  |
|      | ganglion                    | 429   | True  | True  |
|      | horizontal                  | 252   | True  | True  |
|      | microglia                   | 67    | True  | True  |
|      | muller                      | 4567  | False | False |
|      | pericytes                   | 62    | True  | True  |
|      | rods                        | 28534 | False | False |
|      | vascular_endothelium        | 250   | True  | True  |
| MB   | Astrocyte                   | 67357 | False | False |
|      | Choroid_plexus              | 94    | True  | True  |

|  |                                  |        |       |       |
|--|----------------------------------|--------|-------|-------|
|  | Endothelial                      | 46527  | False | False |
|  | Ependymal                        | 2499   | False | False |
|  | Macrophage                       | 1741   | False | False |
|  | Microglia                        | 5717   | False | False |
|  | Mitotic                          | 17     | True  | False |
|  | Mural                            | 12807  | False | False |
|  | Neurogenesis                     | 2515   | True  | False |
|  | Neuron                           | 560672 | False | False |
|  | Olfactory ensheathing cells      | 178    | True  | True  |
|  | Oligodendrocyte                  | 114719 | False | False |
|  | Polydendrocyte                   | 17276  | False | False |
|  | Vascular and leptomenigeal cells | 1087   | True  | False |

Table S3: Optimal FedscGen Configurations by Dataset and Metric

| Dataset    | Metric  | Best Round | Best Epoch | Performance Difference |
|------------|---------|------------|------------|------------------------|
| <b>HDC</b> | ARI     | 6          | 2          | -0.0017                |
|            | NMI     | 3          | 3          | -0.0122                |
|            | EBM     | 1          | 1          | 0.3027                 |
|            | ASW_B   | 2          | 7          | 0.0556                 |
|            | ASW_C   | 2          | 1          | 0.0882                 |
|            | KNN Acc | 6          | 2          | -0.0323                |
| <b>MCA</b> | ARI     | 1          | 7          | 0.1369                 |
|            | NMI     | 7          | 1          | 0.0376                 |
|            | EBM     | 1          | 9          | 0.2531                 |
|            | ASW_B   | 1          | 10         | 0.0218                 |
|            | ASW_C   | 2          | 6          | 0.051                  |

|       |         |   |    |         |
|-------|---------|---|----|---------|
|       | KNN Acc | 6 | 1  | 0.0012  |
| HP    | ARI     | 1 | 7  | 0.0456  |
|       | NMI     | 8 | 5  | 0.0214  |
|       | EBM     | 1 | 2  | 0.1987  |
|       | ASW_B   | 1 | 1  | 0.0326  |
|       | ASW_C   | 7 | 7  | 0.0275  |
|       | KNN Acc | 8 | 5  | -0.0242 |
| PBMC  | ARI     | 9 | 9  | 0.1847  |
|       | NMI     | 4 | 1  | 0.0463  |
|       | EBM     | 1 | 1  | 0.3442  |
|       | ASW_B   | 1 | 1  | 0.055   |
|       | ASW_C   | 2 | 1  | 0.0385  |
|       | KNN Acc | 9 | 1  | 0.0251  |
| CL    | ARI     | 4 | 9  | 0.0691  |
|       | NMI     | 6 | 1  | -0.0128 |
|       | EBM     | 1 | 10 | 0.1438  |
|       | ASW_B   | 1 | 1  | 0.0548  |
|       | ASW_C   | 3 | 1  | -0.068  |
|       | KNN Acc | 3 | 1  | -0.0015 |
| MR    | ARI     | 1 | 8  | 0.1434  |
|       | NMI     | 1 | 2  | 0.0681  |
|       | EBM     | 1 | 10 | 0.0316  |
|       | ASW_B   | 1 | 9  | 0.0279  |
|       | ASW_C   | 2 | 1  | -0.0197 |
|       | KNN Acc | 9 | 2  | 0.0123  |
| MHSPC | ARI     | 3 | 2  | 0.0762  |
|       | NMI     | 2 | 2  | -0.0326 |
|       | EBM     | 1 | 5  | 0.1288  |
|       | ASW_B   | 2 | 2  | 0.0599  |
|       | ASW_C   | 4 | 6  | -0.0015 |
|       | KNN Acc | 4 | 1  | -0.0258 |

## References

1. Zheng GXY, Terry JM, Belgrader P, Ryvkin P, Bent ZW, Wilson R, et al. Massively parallel digital transcriptional profiling of single cells. *Nat Commun.* 2017 Jan 16;8(1):14049.
2. Villani AC, Satija R, Reynolds G, Sarkizova S, Shekhar K, Fletcher J, et al. Single-cell RNA-seq reveals new types of human blood dendritic cells, monocytes, and progenitors. *Science.* 2017 Apr 21;356(6335):eaah4573.
3. Baron M, Veres A, Wolock SL, Faust AL, Gaujoux R, Vetere A, et al. A Single-Cell Transcriptomic Map of the Human and Mouse Pancreas Reveals Inter- and Intra-cell Population Structure. *Cell Syst.* 2016 Oct;3(4):346-360.e4.
4. Muraro MJ, Dharmadhikari G, Grün D, Groen N, Dielen T, Jansen E, et al. A Single-Cell Transcriptome Atlas of the Human Pancreas. *Cell Syst.* 2016 Oct;3(4):385-394.e3.
5. Segerstolpe Å, Palasantza A, Eliasson P, Andersson EM, Andréasson AC, Sun X, et al. Single-Cell Transcriptome Profiling of Human Pancreatic Islets in Health and Type 2 Diabetes. *Cell Metab.* 2016 Oct;24(4):593–607.
6. Wang YJ, Schug J, Won KJ, Liu C, Naji A, Avrahami D, et al. Single-Cell Transcriptomics of the Human Endocrine Pancreas. *Diabetes.* 2016 Oct 1;65(10):3028–38.
7. Xin Y, Kim J, Okamoto H, Ni M, Wei Y, Adler C, et al. RNA Sequencing of Single Human Islet Cells Reveals Type 2 Diabetes Genes. *Cell Metab.* 2016 Oct;24(4):608–15.
8. Saunders A, Macosko EZ, Wysoker A, Goldman M, Krienen FM, De Rivera H, et al. Molecular Diversity and Specializations among the Cells of the Adult Mouse Brain. *Cell.* 2018 Aug;174(4):1015-1030.e16.
9. Rosenberg AB, Roco CM, Muscat RA, Kuchina A, Sample P, Yao Z, et al. Single-cell profiling of the developing mouse brain and spinal cord with split-pool barcoding. *Science.* 2018 Apr 13;360(6385):176–82.
10. Han X, Wang R, Zhou Y, Fei L, Sun H, Lai S, et al. Mapping the Mouse Cell Atlas by Microwell-Seq. *Cell.* 2018 Feb;172(5):1091-1107.e17.
11. The Tabula Muris Consortium, Overall coordination, Logistical coordination, Organ collection and processing, Library preparation and sequencing, Computational data analysis, et al. Single-cell transcriptomics of 20 mouse organs creates a Tabula Muris. *Nature.* 2018 Oct;562(7727):367–72.
12. Nestorowa S, Hamey FK, Pijuan Sala B, Diamanti E, Shepherd M, Laurenti E, et al. A single-cell resolution map of mouse hematopoietic stem and progenitor cell differentiation. *Blood.* 2016 Aug 25;128(8):e20–31.

13. Paul F, Arkin Y, Giladi A, Jaitin DA, Kenigsberg E, Keren-Shaul H, et al. Transcriptional Heterogeneity and Lineage Commitment in Myeloid Progenitors. *Cell*. 2015 Dec;163(7):1663–77.
14. Macosko EZ, Basu A, Satija R, Nemesh J, Shekhar K, Goldman M, et al. Highly Parallel Genome-wide Expression Profiling of Individual Cells Using Nanoliter Droplets. *Cell*. 2015 May;161(5):1202–14.
15. Shekhar K, Lapan SW, Whitney IE, Tran NM, Macosko EZ, Kowalczyk M, et al. Comprehensive Classification of Retinal Bipolar Neurons by Single-Cell Transcriptomics. *Cell*. 2016 Aug;166(5):1308-1323.e30.
